# Supplementary material for: Two dimensional NbSe2/Nb2O5 metal–semiconductor heterostructure-based photoelectrochemical photodetector with fast response and high flexibility
Source: Royal Society of Chemistry journal article supplement (doi:10.1039/d3nh00172e), 2023-01-01
Supplement: d3nh00172e1.pdf [file d3nh00172e1.pdf]

# **Two dimensional NbSe<sub>2</sub>/Nb<sub>2</sub>O<sub>5</sub> metal-semiconductor heterostructure based photoelectrochemical photodetector with fast response and high flexibility**

Xiang Xu<sup>a,‡,\*</sup>, Chunhui Lu<sup>b,‡</sup>, Ying Wang<sup>a</sup>, Xing Bai<sup>a</sup>, Zenghui Liu<sup>a</sup>, Ying Zhang<sup>a</sup> and Dengxin Hua<sup>a</sup>

<sup>‡</sup>Xiang Xu and Chunhui Lu contributed equally to this work.

<sup>a</sup>*School of Mechanical and Precision Instrument Engineering, Xi'an University of Technology, Xi'an 710048, China*

<sup>b</sup>*Institute of Photonics & Photon-Technology, Northwest University, Xi'an 710069, China*

Corresponding author: Tel: +86 15529500771 (Xiang Xu).

E-mail: xxuxxiang@xaut.edu.cn (Xiang Xu).

## **1. scanning electron microscopy (SEM)**

To clearly observe the microstructure NbSe<sub>2</sub>/Nb<sub>2</sub>O<sub>5</sub> film, scanning electron microscopy (SEM) was conducted as shown in Figure S1. The results show that the nanosheets were successfully deposited onto substrate to form a uniform NbSe<sub>2</sub>/Nb<sub>2</sub>O<sub>5</sub> films as shown in Figure S1(a). The nanosheet size is approximately 113 nm in length and from 90 nm in width (in Figure S1(b-c)), in line with TEM results in Figure 2. The sectional-view morphology was also measured and the thickness of NbSe<sub>2</sub>/Nb<sub>2</sub>O<sub>5</sub> film is approximately 367.76 nm as shown Figure S1(d).

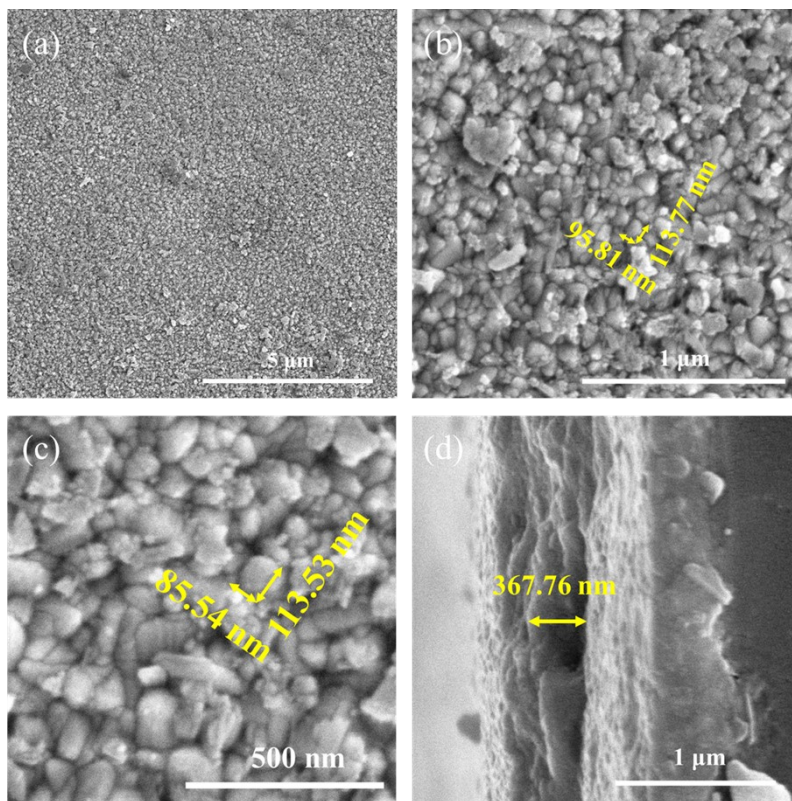

**Fig. S1** (a-c) Top SEM images and (d) sectional-view SEM image of NbSe<sub>2</sub>/Nb<sub>2</sub>O<sub>5</sub> metal-semiconductor heterostructure.

## 2. X-ray diffraction and UV-Vis absorption spectrum

To verify the sample overall composition and crystalline structure, X-ray diffraction (XRD) measurement was performed (Fig. S2a). The bulk powder and exfoliated nanosheets of NbSe<sub>2</sub> were characterized and two obvious peaks at 14.26 and 43.49° correspond to (0 0 4) and (0 0 6) planes, indicating the successful preparation of NbSe<sub>2</sub> nanosheets<sup>1</sup>. Besides, several peaks at 37.29, 42.03, 53.44, and 59.14° corresponding to (1 0 3), (1 0 4), (1 0 6), and (0 0 8) plane also suggest the polycrystalline of NbSe<sub>2</sub> powder. However, other peaks at 9.66, 47.59, and 60.5° from Nb<sub>2</sub>O<sub>5</sub> indicate the presence of surface oxidation due to moisture sensitivity. Furthermore, the NbSe<sub>2</sub>/Nb<sub>2</sub>O<sub>5</sub> shows a high light absorption and broad band absorption from 400 to 900 nm (Fig. S2b).

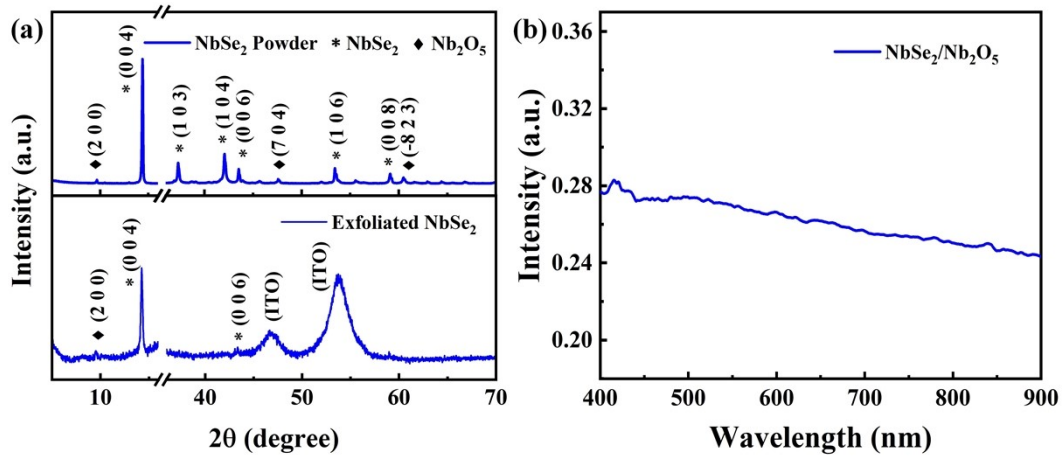

Fig. S2 (a) XRD pattern, and (b) UV-Vis absorption spectrum.

### 3. Photoelectric measurement of 2D NbSe<sub>2</sub>/Nb<sub>2</sub>O<sub>5</sub>

The photoelectric properties were measured under the simulated sunlight illumination at 100 mW/cm<sup>2</sup> and the I-V curve shows an evident photovoltaic activity (Fig. S3a). The results show the photodetectors are sensitive to the external bias voltage. Firstly, time-dependent photocurrent density of the NbSe<sub>2</sub>/Nb<sub>2</sub>O<sub>5</sub>-5000 photodetector was measured without external voltage (Fig. S3b). There is an evident on/off I-t signal and the photocurrent density ( $I_{ph}$ ) is approximately 0.55  $\mu$ A/cm<sup>2</sup>. Accordingly, the calculated  $R_{ph}$  is 5.54  $\mu$ A/W (Fig. 5d).

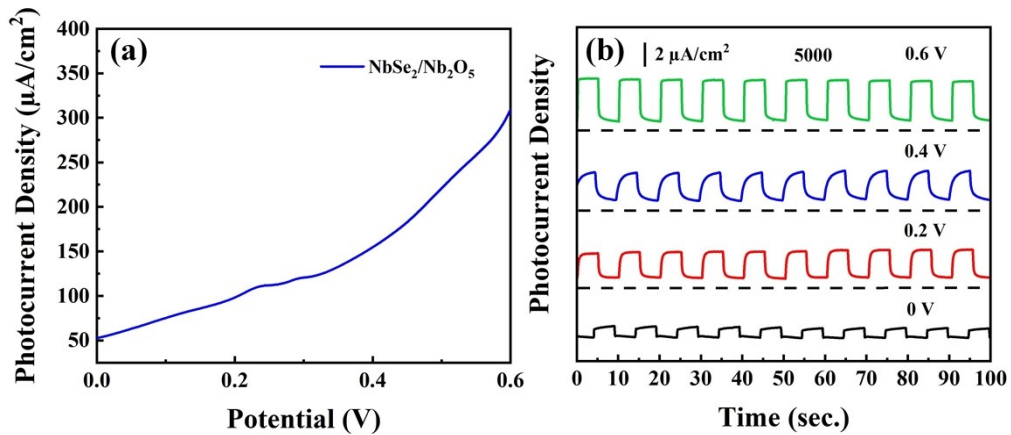

Fig. S3 (a) I-V curve from 0 to 0.6 V; (b) time-dependent photocurrent density under different applied voltage.

#### 4. Schematic of charge transfer mechanism of NbSe<sub>2</sub>/Nb<sub>2</sub>O<sub>5</sub>

The charge transfer process of NbSe<sub>2</sub>/Nb<sub>2</sub>O<sub>5</sub> under light irradiation has been illustrated as shown in Figure S4 in this response letter. When the Nb<sub>2</sub>O<sub>5</sub> metal-semiconductor heterostructure is illuminated, the carrier quickly separates and the electrons enter conduction band. Due to the excellent electrical conductivity and electronic transport capability, the photogenerated electrons of Nb<sub>2</sub>O<sub>5</sub> were quickly transferred toward NbSe<sub>2</sub>. Subsequently, more photogenerated electrons of NbSe<sub>2</sub>/Nb<sub>2</sub>O<sub>5</sub> heterostructure are collected at the flexible ITO-coated PET substrate and then migrated into the counter electrode, resulting in a stronger electrical signal and improving optical detection performance.

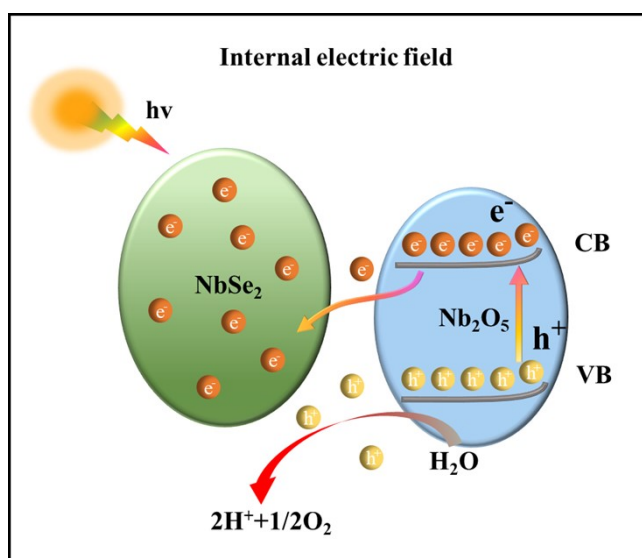

**Fig. S4** Schematic of charge transfer mechanism of NbSe<sub>2</sub>/Nb<sub>2</sub>O<sub>5</sub> under light irradiation

**Table S1** PEC activity comparison of NbSe<sub>2</sub>/Nb<sub>2</sub>O<sub>5</sub> nanosheets under the different measurement conditions

| Materials                                         | Measurement conditions                       | Sample | $I_{ph}$                       | $R_{ph}$                     |
|---------------------------------------------------|----------------------------------------------|--------|--------------------------------|------------------------------|
| NbSe <sub>2</sub> /Nb <sub>2</sub> O <sub>5</sub> | 1 M Na <sub>2</sub> SO <sub>4</sub><br>0.2 V | 1000   | 0.25 $\mu\text{A}/\text{cm}^2$ | 2.52 $\mu\text{A}/\text{W}$  |
|                                                   |                                              | 3000   | 1.63 $\mu\text{A}/\text{cm}^2$ | 16.25 $\mu\text{A}/\text{W}$ |
|                                                   |                                              | 5000   | 1.69 $\mu\text{A}/\text{cm}^2$ | 16.95 $\mu\text{A}/\text{W}$ |
|                                                   |                                              | 7000   | 0.31 $\mu\text{A}/\text{cm}^2$ | 3.06 $\mu\text{A}/\text{W}$  |
|                                                   | 1 M Na <sub>2</sub> SO <sub>4</sub><br>0.4 V | 1000   | 0.73 $\mu\text{A}/\text{cm}^2$ | 7.30 $\mu\text{A}/\text{W}$  |
|                                                   |                                              | 3000   | 1.38 $\mu\text{A}/\text{cm}^2$ | 13.83 $\mu\text{A}/\text{W}$ |
|                                                   |                                              | 5000   | 1.46 $\mu\text{A}/\text{cm}^2$ | 14.62 $\mu\text{A}/\text{W}$ |
|                                                   |                                              | 7000   | 0.79 $\mu\text{A}/\text{cm}^2$ | 7.94 $\mu\text{A}/\text{W}$  |
|                                                   | 1 M Na <sub>2</sub> SO <sub>4</sub><br>0.6 V | 1000   | 1.75 $\mu\text{A}/\text{cm}^2$ | 17.47 $\mu\text{A}/\text{W}$ |
|                                                   |                                              | 3000   | 2.21 $\mu\text{A}/\text{cm}^2$ | 22.07 $\mu\text{A}/\text{W}$ |
|                                                   |                                              | 5000   | 2.32 $\mu\text{A}/\text{cm}^2$ | 23.21 $\mu\text{A}/\text{W}$ |
|                                                   |                                              | 7000   | 1.88 $\mu\text{A}/\text{cm}^2$ | 18.80 $\mu\text{A}/\text{W}$ |

## 5. X-ray photoelectron spectroscopy (XPS) characterization

To characterize the surface oxidation after the measurement, XPS was used (Fig. S5a-c). The Se 3d spectrum from NbSe<sub>2</sub> is fitted by Se 3d<sub>5/2</sub> (53.5 and 54.8 eV) and Se 3d<sub>3/2</sub> (55.3 eV). It is evident that the NbSe<sub>2</sub> decreases while the SeO<sub>2</sub> increase (Fig. S5 a). Furthermore, the fitted O and Nb elements further confirm the increased surface oxidation (Fig. S5b-c).

To verify the oxygen adsorption and desorption process, the oxygen purges electrolyte and enables more oxygen into the electrolyte. The XPS results (Fig. S5d-f) confirm that the surface layer of NbSe<sub>2</sub> has been fully oxidized and the oxygen is enough.

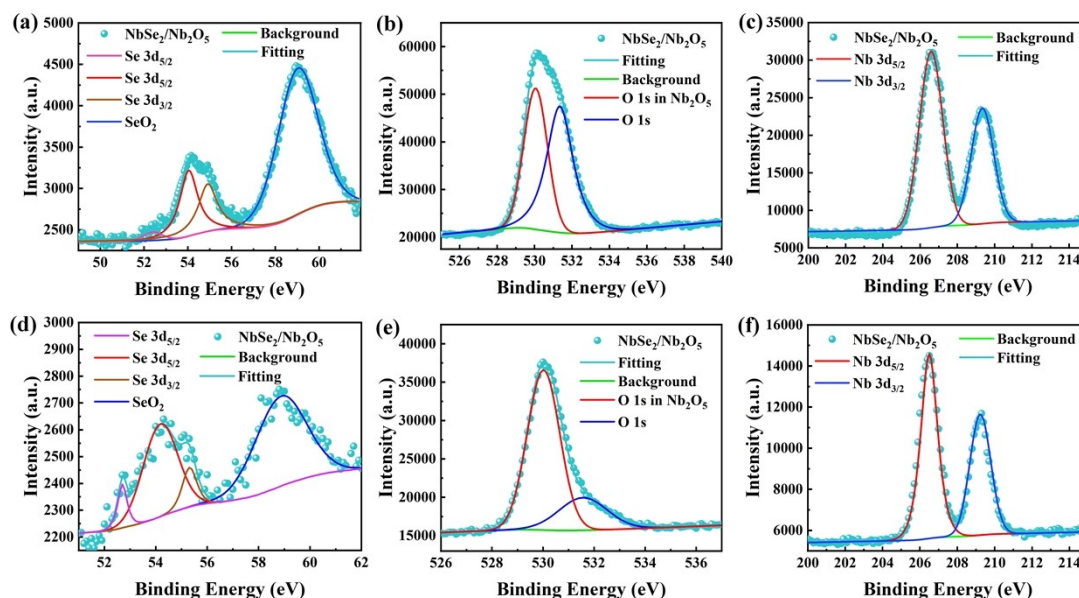

**Fig. S5** XPS signal of NbSe<sub>2</sub>/Nb<sub>2</sub>O<sub>5</sub> with (a) Se, (b) O, and (c) Nb elements after the measurement; XPS signal of NbSe<sub>2</sub>/Nb<sub>2</sub>O<sub>5</sub> nanosheets with (d) Se, (e) O, and (f) Nb elements in enough oxygen condition.

## 6. Photos of the photodetectors under 0, 100, 200, and 300 cycles

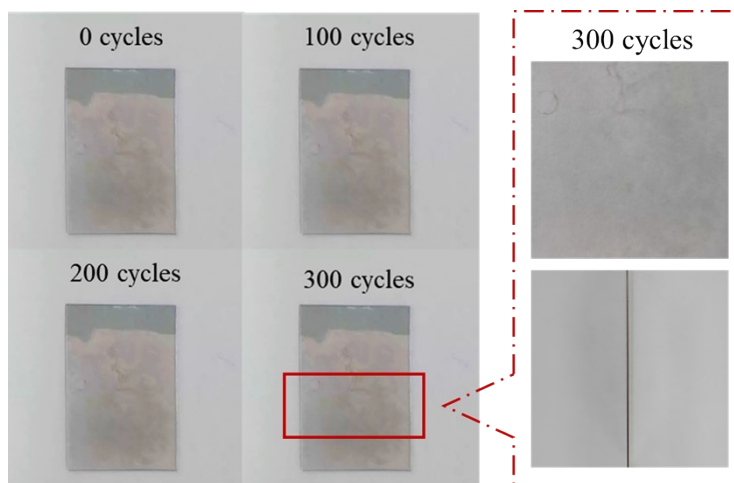

**Fig. S6** Photos of the photodetectors under 0, 100, 200, and 300 cycles

## Reference:

- 1 N. D. Boscher, C. J. Carmalt and I. P. Parkin, *European Journal of Inorganic Chemistry*, 2006, **2006**, 1255-1259.
